# Supplementary material for: Controlled release of antibody proteins from liquid crystalline hydrogels composed of genetically engineered filamentous viruses
Source: Royal Society of Chemistry journal article supplement (doi:10.1039/c6qm00140h), 2016-08-26
Supplement: c6qm00140h1.pdf [file c6qm00140h1.pdf]

Electronic Supplementary Information

**Controlled release of antibody proteins from liquid crystalline hydrogels  
composed of genetically engineered filamentous viruses**

Toshiki Sawada, Miyuki Yanagimachi and Takeshi Serizawa\*

Department of Chemical Science and Engineering, School of Materials and Chemical Technology,  
Tokyo Institute of Technology, 2-12-1-H121 Ookayama, Meguro-ku, Tokyo 152-8550 (Japan)

E-mail: [serizawa@polymer.titech.ac.jp](mailto:serizawa@polymer.titech.ac.jp)

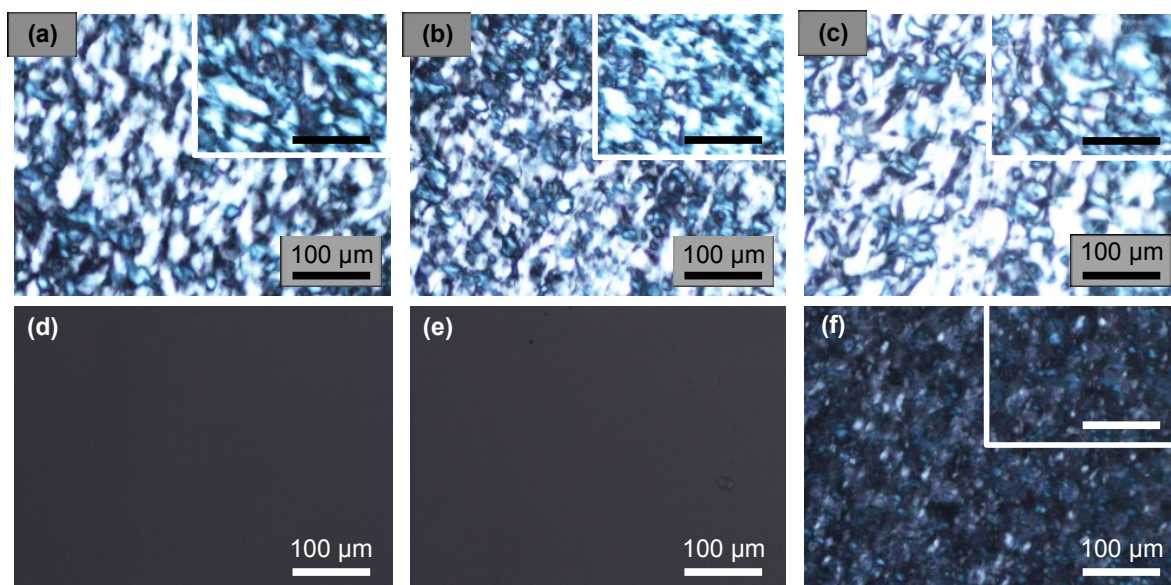

**Fig. S1** (a,b) POM images of the hybrid hydrogels composed of gelatin and (a) wild type and (b) HA-peptide displaying phages (HA-phages). (c) POM image of the hybrid hydrogels composed of gelatin and the HA phages containing anti-HA peptide antibody molecules. (d, e) POM images of gelatin hydrogels and phage solutions. (f) POM image of the hybrid hydrogels composed of gelatin and the HA phages containing anti-HA peptide antibody molecules. The concentration of gelatin, phage, and antibody were 1.5 wt%, 1.0 wt%, and 40 nM, respectively except for the phage concentration in (f). The phage concentration in (f) is 0.02 wt%. Inset images represent POM images with a 45° rotation.

**Table S1** Remained percent of the HA-phage molecules in the hydrogels after 24 h incubation

| [HA phage]/ wt% | 0.02    | 0.05    | 0.1     |
|-----------------|---------|---------|---------|
| %Phage remained | 99.98 < | 99.99 < | 99.99 < |

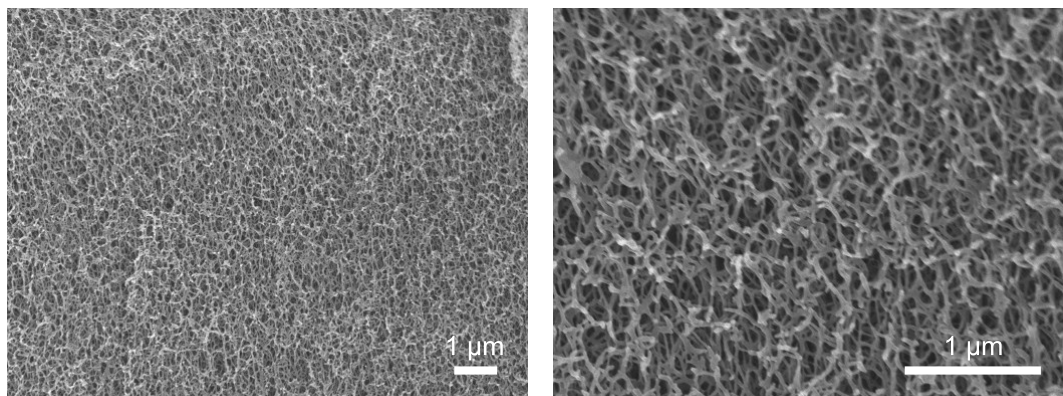

**Fig. S2** SEM images of gelatin hydrogels with different magnifying power.
